# Supplementary material for: Current View on Genetic Relationships within the Bunyamwera Serological Group
Source: MDPI journal article supplement (doi:10.3390/v14061135), 2022-05-25
Supplement: s1 [file s1]

**Table S1.** List of Bunyamwera serogroup sequences used in the study.

| Nº | Virus species<br>(ICTV)               | Virus species<br>(in fact)                       | Virus name                 | Strain/iso<br>late | Isolation<br>region | Isolation<br>source<br>put<br>genus<br>and<br>species<br>names<br>in italics | Isolation<br>date | References            |
|----|---------------------------------------|--------------------------------------------------|----------------------------|--------------------|---------------------|------------------------------------------------------------------------------|-------------------|-----------------------|
| 1  | <i>Bunyamwera<br/>orthobunyavirus</i> | <i>Fort Sherman<br/>orthobunyavirus</i><br>(FSV) | Bunyamwera virus<br>(BUNV) | SFAbCrE<br>q238    | Argentina           | Horse                                                                        | 2013              | KP063898-<br>KP063900 |
| 2  | <i>Bunyamwera<br/>orthobunyavirus</i> | <i>Fort Sherman<br/>orthobunyavirus</i><br>(FSV) | Bunyamwera virus<br>(BUNV) | SFAbCrE<br>q232    | Argentina           | Horse                                                                        | 2013              | KP063895-<br>KP063897 |
| 3  | <i>Bunyamwera<br/>orthobunyavirus</i> | <i>Fort Sherman<br/>orthobunyavirus</i><br>(FSV) | Bunyamwera virus<br>(BUNV) | SFCrEq<br>231      | Argentina           | Horse                                                                        | 2013              | KP063892-<br>KP063894 |
| 4  | <i>Bunyamwera<br/>orthobunyavirus</i> | <i>Bunyamwera<br/>orthobunyavirus</i>            | Bunyamwera virus<br>(BUNV) | 46A-122            | Kenya               | <i>Aedes<br/>ochraceus</i>                                                   | 2006              | MH484288-<br>MH484290 |
| 5  | <i>Bunyamwera<br/>orthobunyavirus</i> | <i>Bunyamwera<br/>orthobunyavirus</i>            | Bunyamwera virus<br>(BUNV) | unknown            | unknown             | unknown                                                                      | unknown           | NC001925-<br>NC001927 |
| 6  | <i>Bunyamwera<br/>orthobunyavirus</i> | <i>Bunyamwera<br/>orthobunyavirus</i>            | Ngari virus<br>(NRIV)      | 9800521            | Somalia             | Human                                                                        | 1998              | JX857325-<br>JX857327 |
| 7  | <i>Bunyamwera<br/>orthobunyavirus</i> | <i>Bunyamwera<br/>orthobunyavirus</i>            | Ngari virus<br>(NRIV)      | 9800535            | Kenya               | Human                                                                        | 1998              | JX857328-<br>JX857330 |
| 8  | <i>Bunyamwera<br/>orthobunyavirus</i> | <i>Bunyamwera<br/>orthobunyavirus</i>            | Ngari virus<br>(NRIV)      | Adrar              | Mauritania          | Small<br>ruminant                                                            | 2010              | KJ716848-<br>KJ716850 |

|    |                                   |                                   |                         |                 |              |                              |         |                              |
|----|-----------------------------------|-----------------------------------|-------------------------|-----------------|--------------|------------------------------|---------|------------------------------|
| 9  | <i>Bunyamwera orthobunyavirus</i> | <i>Bunyamwera orthobunyavirus</i> | Ngari virus (NRIV)      | Dakar D28542/4e | Senegal      | Human                        | 1979    | KC608152-KC608154            |
| 10 | <i>Bunyamwera orthobunyavirus</i> | <i>Bunyamwera orthobunyavirus</i> | Ngari virus (NRIV)      | SUD-HKV66       | Sudan        | Human                        | 1988    | JX857319-JX857321            |
| 11 | <i>Bunyamwera orthobunyavirus</i> | <i>Bunyamwera orthobunyavirus</i> | Ngari virus (NRIV)      | SUD-HKV141      | Sudan        | Human                        | 1988    | JX857322-JX857324            |
| 12 | <i>Bunyamwera orthobunyavirus</i> | <i>Northway orthobunyavirus</i> * | Northway virus (NORV)   | 0234            | USA          | Aedes sp.                    | 1971    | MH484312-MH484314            |
| 13 | <i>Bunyamwera orthobunyavirus</i> | <i>Shokwe orthobunyavirus</i> *   | Shokwe virus (SHOV)     | SAAr 4042       | South Africa | Aedes cummingsii             | 1962    | MH484330-MH484332            |
| 14 | <i>Bunyamwera orthobunyavirus</i> | <i>Main Drain orthobunyavirus</i> | Lokern virus (LOKV)     | A 10391         | USA          | unknown                      | unknown | MH484303-MH484305            |
| 15 | <i>Bunyamwera orthobunyavirus</i> | <i>Main Drain orthobunyavirus</i> | Lokern virus (LOKV)     | FMS 4332        | USA          | Culex tarsalis               | 1962    | MG820264, MG828823, MG696865 |
| 16 | <i>Bunyamwera orthobunyavirus</i> | <i>Main Drain orthobunyavirus</i> | Santa Rosa virus (SARV) | M2-1493         | Mexico       | Ochlerotatus angustivittatus | 1972    | MH484324-MH484326            |
| 17 | <i>Main Drain orthobunyavirus</i> | <i>Main Drain orthobunyavirus</i> | Main Drain virus (MDV)  | 72V2567         | USA          | Aedes vexans                 | 1972    | MH484306-MH484308            |
| 18 | <i>Main Drain orthobunyavirus</i> | <i>Main Drain orthobunyavirus</i> | Main Drain virus (MDV)  | R4680           | USA          | Anopheles freeborni          | 1974    | MH484309-MH484311            |
| 19 | <i>Batai orthobunyavirus</i>      | <i>Willare orthobunyavirus</i> *  | Batai virus (BATV)      | K10441          | Australia    | Culex annulirostris          | 1993    | KU661980, KU661984, KU661991 |
| 20 | <i>Batai orthobunyavirus</i>      | <i>Batai orthobunyavirus</i>      | Batai virus (BATV)      | BatNM/12        | China        | Cattle                       | 2014    | KJ187038-KJ187040            |

|    |                              |                              |                     |                   |                |                               |         |                     |
|----|------------------------------|------------------------------|---------------------|-------------------|----------------|-------------------------------|---------|---------------------|
| 21 | <i>Batai orthobunyavirus</i> | <i>Batai orthobunyavirus</i> | Batai virus (BATV)  | ZJ2014            | China          | Muscovy duck                  | 2014    | KU746869-KU746871   |
| 22 | <i>Batai orthobunyavirus</i> | <i>Batai orthobunyavirus</i> | Batai virus (BATV)  | MM2222            | Malaysia       | <i>Culex gelidus</i>          | 1955    | JX846595-JX846597   |
| 23 | <i>Batai orthobunyavirus</i> | <i>Batai orthobunyavirus</i> | Batai virus (BATV)  | Chittoor/IG-20217 | India          | <i>Anopheles barbirostris</i> | 1957    | JX846598-JX846600   |
| 24 | <i>Batai orthobunyavirus</i> | <i>Batai orthobunyavirus</i> | Batai virus (BATV)  | UgMP-6830         | Uganda         | <i>Aedes abnormalis</i>       | unknown | JX846601-JX846603   |
| 25 | <i>Batai orthobunyavirus</i> | <i>Batai orthobunyavirus</i> | Batai virus (BATV)  | CVOV 41.3         | Austria        | <i>Anopheles maculipennis</i> | 2013    | KM507321-KM507323   |
| 26 | <i>Batai orthobunyavirus</i> | <i>Batai orthobunyavirus</i> | Batai virus (BATV)  | Italy-2009        | Italy          | Mosquito                      | 2009    | KC168046-KC168048   |
| 27 | <i>Batai orthobunyavirus</i> | <i>Batai orthobunyavirus</i> | Batai virus (BATV)  | PV424             | Germany        | <i>Phoca vitulina</i>         | 2016    | MH299972-MH299974   |
| 28 | <i>Batai orthobunyavirus</i> | MS50 <i>orthobunyavirus</i>  | Batai virus (BATV)  | MS50              | Malaysia       | <i>Aedes curtipes</i>         | 1962    | NC_043579-NC_043581 |
| 29 | <i>Batai orthobunyavirus</i> | <i>Batai orthobunyavirus</i> | Calovo virus (CVOV) | 134               | Czech Republic | <i>Anopheles maculipennis</i> | 1963    | KJ542624-KJ542626   |
| 30 | <i>Batai orthobunyavirus</i> | <i>Batai orthobunyavirus</i> | Calovo virus (CVOV) | JAn (MS3)         | Croatia        | <i>Anopheles maculipennis</i> | 1969    | KJ542627-KJ542629   |
| 31 | <i>Batai orthobunyavirus</i> | <i>Batai orthobunyavirus</i> | Calovo virus (CVOV) | 138-pool 468      | Yugoslavia     | unknown                       | 1983    | KC608155-KC608157   |
| 32 | <i>Batai orthobunyavirus</i> | <i>Batai orthobunyavirus</i> | Calovo virus (CVOV) | 8020              | Slovakia       | <i>Anopheles maculipennis</i> | 1975    | KJ542630-KJ542632   |

|    |                                     |                                     |                          |             |          |                          |      |                     |
|----|-------------------------------------|-------------------------------------|--------------------------|-------------|----------|--------------------------|------|---------------------|
| 33 | <i>Batai orthobunyavirus</i>        | <i>Batai orthobunyavirus</i>        | Calovo virus (CVOV)      | 8040        | Slovakia | Anopheles maculipennis   | 1975 | KJ542633-KJ542635   |
| 34 | <i>Cache Valley orthobunyavirus</i> | <i>Cache Valley orthobunyavirus</i> | Cache Valley virus (CVV) | 6V633       | USA      | Culiseta inornata        | 1956 | NC_043618-NC_043620 |
| 35 | <i>Cache Valley orthobunyavirus</i> | <i>Cache Valley orthobunyavirus</i> | Cache Valley virus (CVV) | W728-67     | USA      | Aedes communis           | 1967 | KX100136-KX100138   |
| 36 | <i>Cache Valley orthobunyavirus</i> | <i>Cache Valley orthobunyavirus</i> | Cache Valley virus (CVV) | MPB1-1551   | USA      | Psorophora confinnis     | 1971 | KX100142-KX100144   |
| 37 | <i>Cache Valley orthobunyavirus</i> | <i>Cache Valley orthobunyavirus</i> | Cache Valley virus (CVV) | W308-67     | USA      | Aedes trivittatus        | 1967 | KX100139-KX100141   |
| 38 | <i>Cache Valley orthobunyavirus</i> | <i>Cache Valley orthobunyavirus</i> | Cache Valley virus (CVV) | CK-102      | USA      | Sheep                    | 1980 | KX100145-KX100147   |
| 39 | <i>Cache Valley orthobunyavirus</i> | <i>Cache Valley orthobunyavirus</i> | Cache Valley virus (CVV) | R103016b    | USA      | Human                    | 2015 | MK861965-MK861967   |
| 40 | <i>Cache Valley orthobunyavirus</i> | <i>Cache Valley orthobunyavirus</i> | Cache Valley virus (CVV) | WI-03BS7669 | USA      | Human                    | 2003 | KX100151-KX100153   |
| 41 | <i>Cache Valley orthobunyavirus</i> | <i>Cache Valley orthobunyavirus</i> | Cache Valley virus (CVV) | MI80-1-450  | USA      | Horse                    | 1980 | KX100148-KX100150   |
| 42 | <i>Cache Valley orthobunyavirus</i> | <i>Cache Valley orthobunyavirus</i> | Tlacotalpan virus (TLAV) | 61D240      | Mexico   | Mansonella titillans     | 1961 | MH484342-MH484344   |
| 43 | <i>Maguari orthobunyavirus</i>      | <i>Cache Valley orthobunyavirus</i> | Playas virus (PLAV)      | 75V5938     | Ecuador  | Aedeomyia taeniorhynchus | 1975 | KX100124-KX100126   |
| 44 | <i>Maguari orthobunyavirus</i>      | <i>Maguari orthobunyavirus</i>      | Playas virus (PLAV)      | 75V5758     | Ecuador  | Aedeomyia taeniorhynchus | 1975 | KX100127-KX100129   |

|    |                                     |                                     |                          |              |           |                              |      |                              |
|----|-------------------------------------|-------------------------------------|--------------------------|--------------|-----------|------------------------------|------|------------------------------|
| 45 | <i>Maguari orthobunyavirus</i>      | <i>Cache Valley orthobunyavirus</i> | Maguari virus (MAGV)     | CoAr 3363    | Colombia  | <i>Aedes scapularis</i>      | 1964 | KX100106-KX100108            |
| 46 | <i>Maguari orthobunyavirus</i>      | <i>Maguari orthobunyavirus</i>      | Maguari virus (MAGV)     | OBS 6657     | Peru      | Human                        | 1998 | KX100115-KX100117            |
| 47 | <i>Maguari orthobunyavirus</i>      | <i>Maguari orthobunyavirus</i>      | Maguari virus (MAGV)     | BeAr 7272    | Brazil    | Mosquito                     | 1957 | KX100103-KX100105            |
| 48 | <i>Maguari orthobunyavirus</i>      | <i>Fort Sherman orthobunyavirus</i> | Maguari virus (MAGV)     | AG83-1746    | Argentina | <i>Psorophora varinervis</i> | 1982 | KX100112-KX100114            |
| 49 | <i>Maguari orthobunyavirus</i>      | <i>Fort Sherman orthobunyavirus</i> | Maguari virus (MAGV)     | CbaAr 426    | Argentina | <i>Aedes albifasciatus</i>   | 1965 | KX100109-KX100111            |
| 50 | <i>Fort Sherman orthobunyavirus</i> | <i>Fort Sherman orthobunyavirus</i> | Fort Sherman virus (FSV) | Barreiras    | Brazil    | Horse                        | 2018 | MN379833-MN379835            |
| 51 | <i>Fort Sherman orthobunyavirus</i> | <i>Fort Sherman orthobunyavirus</i> | Fort Sherman virus (FSV) | 86MSP18      | Panama    | Human                        | 1985 | MH484294-MH484296            |
| 52 | <i>Tensaw orthobunyavirus</i>       | <i>Tensaw orthobunyavirus</i>       | Tensaw virus (TENV)      | TSV-FL06     | USA       | Mosquito                     | 2006 | FJ943506, FJ943507, FJ943509 |
| 53 | <i>Tensaw orthobunyavirus</i>       | <i>Tensaw orthobunyavirus</i>       | Tensaw virus (TENV)      | TSV-FE3-66FB | USA       | Mosquito                     | 1963 | NC_043546-NC_043548          |
| 54 | <i>Tensaw orthobunyavirus</i>       | <i>Tensaw orthobunyavirus</i>       | Tensaw virus (TENV)      | A9-171B      | USA       | <i>Anopheles crucians</i>    | 1960 | MH484333-MH484335            |
| 55 | <i>Potosi orthobunyavirus</i>       | <i>Potosi orthobunyavirus</i>       | Potosi virus (POTV)      | 89-3380      | USA       | <i>Aedes albopictus</i>      | 1989 | MH484321-MH484323            |
| 56 | <i>Potosi orthobunyavirus</i>       | <i>Potosi orthobunyavirus</i>       | Potosi virus (POTV)      | IL94-1899    | USA       | <i>Aedes albopictus</i>      | 1994 | NC_043645-NC_043647          |

|    |                                  |                                  |                        |                 |                 |                         |      |                     |
|----|----------------------------------|----------------------------------|------------------------|-----------------|-----------------|-------------------------|------|---------------------|
| 57 | <i>Anadyr orthobunyavirus</i>    | <i>Anadyr orthobunyavirus</i>    | Anadyr virus (ANADV)   | LEIV-13395Mg    | Russia          | Aedes sp.               | 1986 | NC_055199-NC_055201 |
| 58 | <i>Birao orthobunyavirus</i>     | <i>Birao orthobunyavirus</i>     | Birao virus (BIRV)     | DakArB 2198     | CAR             | Anopheles pharonsis     | 1969 | MH484282-MH484284   |
| 59 | <i>Bozo orthobunyavirus</i>      | <i>Bozo orthobunyavirus</i>      | Bozo virus (BOZOV)     | DakArB 7343     | CAR             | Aedes opok              | 1975 | NC_043653-NC_043655 |
| 60 | <i>Ilesha orthobunyavirus</i>    | <i>Ilesha orthobunyavirus</i>    | Ilesha virus (ILEV)    | ILESHA/8e       | Senegal         | Human                   | 1972 | KC608149-KC608151   |
| 61 | <i>Ilesha orthobunyavirus</i>    | <i>Ilesha orthobunyavirus</i>    | Ilesha virus (ILEV)    | R5964           | Nigeria         | Human                   | 1957 | NC_043585-NC_043587 |
| 62 | <i>Ilesha orthobunyavirus</i>    | <i>Ilesha orthobunyavirus</i>    | Ilesha virus (ILEV)    | KO/2            | Western Nigeria | Human                   | 1967 | MT272830-MT272832   |
| 63 | <i>Kairi orthobunyavirus</i>     | <i>Kairi orthobunyavirus</i>     | Kairi virus (KRIV)     | BeAr8226        | Brazil          | Ochlerotatus scapularis | 1957 | NC_038738-NC_038740 |
| 64 | <i>La Crosse orthobunyavirus</i> | <i>La Crosse orthobunyavirus</i> | La Crosse virus (LACV) | LACV/human/1960 | USA             | Human                   | 1960 | EF485030-EF485032   |
